# Supplementary material for: The Genomic Organisation of the TRA/TRD Locus Validates the Peculiar Characteristics of Dromedary δ-Chain Expression
Source: Preprints.org preprint supplement (doi:10.20944/preprints202103.0379.v1), 2021-03-15
Supplement: Supplementary file 1 [file Supplementary FIgure S1 .doc]

LEADER FR1-IMGT CDR1-IMGT FR2-IMGT CDR2-IMGT FR3-IMGT CDR3-IMGT

(1-26) (27-38) (39-55) (56-65) (66-104) (105-117)

A B BC C C' C'C" C" D E F FG

(1-15) (16-26) (27-38) (39-46) (47-55) (56-65) (66-74) (75-84) (85-96) (97-104) (105-117)

——————————————> ——————————> ———————> ————————> ————————> —————————> ———————————> ———————>

Gene Functionality 1 10 15 16 **23** 26 27 38 39**41** 46 47 55 56 65 66 74 75 80 84 85 **89** 96 97 **104** 105

|........|....| |......|..| |..........| |.|....| |.......| |........| |.......| |....|...| |...|......| |......| |.....

TRAV1 F MWGFFLLYVSLTVGGTV GQGVQQ.PTDLMAME GEFVQVN**C**TYQ TSR......FDG LS**W**YQQHD GRAPVFLSY NVL....DGW ERR.....G RFSSFLSRSD AHSY**L**LLKELRT EDSASYL**C** AVI...[6.6.3]

TRAV2 ORF MALRSTLEVVRLGLLLIAES KDQVFQ.PSTVVSSE GAMAEIY**C**NHS ISN......AYN FF**W**YLHFP GCAPRLLIQ GS......KP SHQ.....G RYNMTYER.. LSSS**L**LIPQVRL ADAAVYY**C** GLA...[6.4.3]

TRAV3 F MASACISTLAILFTLSGLR AQSATQLKEPITGAE GEPLTVK**C**AYS LSG......TPY RF**W**YVQYP SQGLQFLLK YVAG..DNLV KGN.....Y GFEAEFNKSQ TSFH**L**KKASVQG SDSALYF**C** AVT...[6.8.3]

TRAV4 F MRQMTRVTVLLILGTLS LAKTIQ.PVFIDSYE GQEVNIP**C**NHT NIAT.....SEY IF**W**YRQFP NQGPQFVIQ GYK.....TN AAN.....E VASLFIPTDR KSST**L**SLPWATL RDTAVYY**C** IVSD..[7.5.4]

TRAV8-1 ORF MSLVPVLVLMTLFALRGA QSVTQPDRHGITVPE GARLELR**C**NYS SSY......PPS LF**W**YVWYP NQGLQLLLK YTSG..NNLV SGI.....K GFVAEFRRNE TSFH**L**KKTSAHW SDSAEYF**C** AVV...[6.8.3]

TRAV8-2 P MLLLLISVLGMTFTLNA* AQTVTQPDDHVLISE KASLELR**C**NYS YGA......SVY LF**W**YVQYP CQGLQVLLK YFSG..DPLV QGI.....K SFESEFKRSE SSFN**L**RKSSVHW SDSAEYF**C** AVS...[6.8.3]

TRAV9-1 F MNSSPGIVIVLFLMFGGSN EDSVSQTEGQVTPSE GDSLIVN**C**SYE TTQ......YPA LF**W**YVQYP GEGPQLLLK ASRD...NEM ASN.....K GFKATYHRKP NSFH**L**EKASVRG ADSAVYY**C** ALG...[6.7.3]

TRAV9-2 F MNSSPGLVTVVLLMLGRTH GDSVMQTEGPVTLSE TAALTIN**C**SYS TTT......YPT LF**W**YVQYS GEGPQLLLK ASRD...KEK VLK.....K GFEAMHHREQ TSFH**L**EKASVQG ADSAVYY**C** ALT...[6.7.3]

TRAV9-3 F MNSSPGLVTVVLLMLGRTR GDSVTQTEGPVTLPE SAALTMN**C**NYS AAG......YPT LF**W**YVQYP GEGPQLLLK ASRD...KEK VLK.....K GFEATYHREQ TSFH**L**EKASVRG ADSAVYY**C** ALG...[6.7.3]

TRAV9-4 F MNSSPGLVTVVLLMLGRTR GDSVTQTEGPVTLPE SAALTMN**C**NYS AAG......YPT LF**W**YVQYP GEGPQLLLK ASRD...KEK VLK.....K GFEATYHREQ TSFH**L**EKASVRG ADSAVYY**C** ALT...[6.7.3]

TRAV12-1 F MLKSSTGFLVTLWLQLTWM WSRQKGAAQSLNVPE GATASLT**C**SYS NSN......SQN FM**W**YRQYS GRGPEWLMT FYP....NND KQE.....G RYTAQVNKSS RYVS**L**HIRDSQP SDSAAYL**C** AES...[6.6.3]

TRAV13-2 F MKTPIGALIMFLWLQLHCVSQ GENVKQSPPSLSVQE GNSSVIT**C**TYT DSN......SDF FP**W**YKQEP GKGLRFLIS IRSN...KVK EED.....Q GLTVLLNKTA KHLS**L**HITATQA GDTAVYF**C** AAS...[6.7.3]

TRAV13-3 F MKTPIGALIMFLWLQLDCVSR GENVEQSPPSLSVQE GNSSVIT**C**TYT DSR......SEY FP**W**YKQEP GKGLRFLIS IRSN...KVK EED.....Q GLTVLLNKTA KHLS**L**HITATQA GDAAVYF**C** AAS...[6.7.3]

TRAV14-1 F MLLSSLLKVAMASCWLGSSI AQTVTQEQPPMLVQE KEAVTLD**C**TYD TSDP.....TYS LS**W**YKQPS SGAMTFLIR QDSY..NQQN ATE.....G HYSLNFQKAS KSIK**L**VISASQL EDSAVYF**C** ALSE..[7.8.4]

TRAV18 F MLSASCSGLVILLILRGTS GDTVTQTEDPVILPE GAFLTLN**C**TYE TSY......SAF LF**W**YVQYL NKEPELLLK SSE....NQK VVR.....G GFQATLVKSS RTFH**L**QKASVQT SDSAVYY**C** ALS...[6.6.3]

TRAV19-3 F MRFPGLLRVVIASVCLGSVK AQKVTQDQPAISRPE KEAATLD**C**VYE AKGY.....SYY LL**W**YKQAA SGEMLFLIH QESY..NERN TTE.....G RYFLNFQKSA SSIS**L**TITALEL GDSAVYF**C** ALND..[7.8.4]

TRAV22-2 F MKRLVGAVLGLLFAQICCVT GEDVEQSPPVLSLQE GAASTLW**C**KFS SSV.......TS VH**W**YHQNP GGRLIHLFS VAS.....GT KHD.....G RFSATTVAKE RRSS**L**NISSSQT TDSVTYF**C** AV....[5.5.2]

TRAV22-3 F MKRLVDAVLGLLFAQVCCVT GEDVEQSPPVLSLQE GAASTLW**C**KFS SSV.......TS VH**W**YHQNP GGRLIHLFS VAS.....GT KHD.....G RFSATTVAKE RRSI**L**NISSSQT TDSATYF**C** AVE...[5.5.3]

TRAV22-7 F MKRLVGAVLGLLFAQVCCVT GEDVEQSPPVLILQE GATSTLW**C**KFS SSV.......TS VH**W**YHQNP GGRLIHLFY VAS.....GT KHD.....G RFSATTVAKT ....**V**AASSSQT TDSATYF**C** AV....[5.5.2]

TRAV22-8 F MKRLVGAVLGLLCAQVCCVT GEDVEQSPPVLSLQE GATSTLW**C**KFS SSV.......TS LR**W**YRQNP GGRLIHLFY VAS.....GT KHD.....G RFSATTVIQE RRSS**L**NISSSQT TDSATYF**C** AV....[5.5.2]

TRAV23-2 P MDKLLGAVFLIPWLQVS*VSGQQNGKSE QQQVKQSPQPLAVHE GAISILK**C**TYE NDA......FDY FP**R**YRQYP GQGPEFLIA KTSG...GNK KED.....G RFTVSSNKSA KHFS**L**HIKDSQP GDSATDF**C** AAS...[6.7.3]

TRAV23-4 F MDRILGASFLILWLQPGWVSGQQDGKSD QQQVKQSPQPLEVHE GAISILN**C**TYE NSL......FNY FS**W**YRQYP GQGPEFLIG KSSG...GNK KED.....G RFTVSSNGNA KHFS**L**HIKDSQP GDAATYF**C** AAS...[6.7.3]

TRAV23-4D F MDRILGASFLILWLQPGWVSGQQDGKSD QQQVKQSPQPLEVHE GAISILN**C**TYE NSL......FNY FS**W**YRQYP GQGPEFLIG KSSG...GNK KED.....G.RFTVSSNGNA.KHFS**L**HIKDSQP GDAATYF**C** AAS...[6.7.3]

TRAV24-3 F MERNPWPVSLLILWLHLGGSR LLSMKQGPPRLHFQE GECTNAT**C**SFP SSS......FYA FH**W**YRWEP ARSPKNLFV MSLN...GDE KEE.....G QVRVTLSTKD GHSS**L**HIKGPQP EDSAASL**C** AS....[6.7.2]

TRAV24-5 P MERNPWPVSLLILWLHLRGSR LLSTKQGPPRVHVQE GESTNAT**C**SFP SSL......F*A FH**C**YRWEP ARSPKNLFV MSLN...GDE KEE.....G QVRVTLNTKD GHSS**L**HIKGPQP EDSATSL**C** AS....[5.7.2]

TRAV24-6 P MERNPWPVSLLILWLHLGGGA AS*ARNRVLHGCTVQE GESINAT**C**SFP SSS......FYA SH**W**YRWEP ARSPKNLFV MSLN...GDE KEE.....G QVRVTLSTKD SHSS**L**HIKGPQP EDSAASL**C** AS....[6.7.2]

TRAV24-7 F MERNPWPVSCDLWLILVGGSR LLSTKQGPPRVHVQE GESINAT**C**SFP SSS......FYA SH**W**YRWEP ARSPKNLFV MSLN...GDE KEE.....G QVRVTLSTKD GHSS**L**HIKGPQP EDSAASL**C** AS....[6.7.2]

TRAV25-2 F MFLITTILILWMQISQVN GQQLKQIPEFVPLQE GENFTTY**C**NTS SPL.......DS LH**W**YKQQP GGRPVFLML LTKG...GDV KRP.....E RLTARFGETR KDRF**L**HIPAAQT ADVGNYF**C** AG....[5.7.2]

TRAV25-3 F MFLITTILILWMQRPQVN GQQLKQIPEFVPLQE GENFTTY**C**NTS SSL.......TS LQ**W**YKQQP GGRPVFLMT LTKS...GDV TRQ.....G RLTARFGETR KDSF**L**HIPAAQT ADVGTYF**C** AG....[5.7.2]

TRAV25-4 F MFLITTILILWMQISQVN GQQLKQIPEFVPLQE GENFTTY**C**NTT SPL.......NS LQ**W**YKQQP GGRPVFLMT LTKS...GDV TRQ.....G RLTARFGETR KDSF**L**HIPAAQT ADVGTYF**C** AG....[5.7.2]

TRAV27 P MFLNFSVLVLWIQLAWES TQQLEQSPRFLSVQE GENFTMY**C**NSS STF.......SS FH**W**YRQSP EEGPVLLMI LTKG...GEM KTQ.....K RLKARFGEAR KDSS**L**SSTAAQP GDAGVYL**C** AG....[5.7.2]

TRAV28 F MKTQIGVLLGLLWIQIYWLRV QMKVEQSPGVLTLQE GENSSLT**C**NFS VSL.......TS LQ**W**FQQKP DGRLISLFY IAS.....GM.KQN.....G.RLTATVNIRE SYSH**L**HIRDSQP GDSATYF**C** AVE...[5.5.3]

TRAV33-1/DV6-1 F MLLPGLLWAFVASFGFGSGM AAKVTQNQTTETAQE GQAVTMH**C**TYE TTAQ.....RYT LY**W**YKQGP SGGMAFLIY QDDN...KAN AKR.....D RYSVNFQKAN QSIS**L**TISSSQL ADSGKYF**C** ALWRY.[7.7.5]

TRAV33-2/DV6-2 F MLLPGLLWAFVASFGFGSGM AAKVTQTQTTETAQE GQAVTMH**C**TYE TSAL.....RYT LY**W**YKQGP SGGMAFLIY QDDN...KAN AKR.....D RYSVNFQKAK QSIS**L**TISSSQL ADSGKYF**C** ALWDY.[7.7.5]

TRAV36 F MEKWPQASLLIFWLQLSWVSS DDKVIQSPPSLVVHE GTSATLN**C**SYK VTN......FQS LY**W**YKQEE KGL.AFLFV LVST...GIE KKS.....G RLRGTLDKKE LLRT**L**HITATEP EDSATYL**C** AVE...[6.7.3]

TRAV38 F MTPVSLLWAALLSTCLGASV AQMVTQPQPEVSVRE AQTATLD**C**TYN TVQS.....DYY LF**W**YKQPP SGETIFIIH QEAY..KQQN ATA.....N RYSVNFQKAA KSFS**L**RISDSQL EDAAMYF**C** AYTG..[7.8.4]

TRAV39 F MKKLLAVILWLQLDWLNA EVNVEQSPPSLSIQE GEDCTVY**C**NYS SGT......SDR LH**W**YRQDL GKSLEFLFL LTS....GAV KQE.....G QLTASLDTKA RRST**L**HITASQP SFSATYF**C** ALD...[6.6.3]

TRAV40 F MNSPLGSLILIFVFGGT SSNSVQQTSQVTVSE GTSVTMN**C**TYT SAG......YPT LF**W**YVQYP NKALRFLQE ET......MK NSK.....N FGARNIKD.. KSSP**I**TIYPAQI ADSAVYY**C** LLR...[6.4.3]

TRAV41 F MGKPQQVLLIVLWLQLSWISG ENEVEQSPPYLSAQE GDFVTVN**C**SYS VVM.......TT LQ**W**LQQKP GGGIESLFI LSL.....EM KKE G RVSATINRKE RHGS**L**HITAAQP RDSAVYI**C** AVE...[5.5.3]

TRAV43-1 F MKRHWGSLLGLLWVQVCWVR GMNVEQSPSALSIQE GTSSTLQ**C**NFS NPV.......NY VQ**W**FRQNP GGGLINLFY ITL.....GM KQN.....G RLNSTLNSKE QYST**L**HITASQL EDSATYL**C** AAE...[5.5.3]

TRAV43-2 P MKRHRGSLLGLLWLQISWVR GVNVEQSPSALSLQE GTSSTLR**C**NFS AAV.......NG V***W**FRQNP GGGLISLFY IAS.....GM KQN.....G RLNSTLNSKE RYSS**L**HITASQL EDSATYL**C** AAE...[5.5.3]

TRAV44-1 F MRLVTGVAVLLTLGIVI EAEIDQ.PKSKDFAE GEDVNLP**C**NHS TIGV.....SDY IH**W**YQQKP SQSPQYIIH GFR.....DT VTN.....N MASLTIATDR KSST**L**VLPRVTL RDSAVYY**C** ALRE..[7.5.4]

TRAV44-2 F MRLVTGVAVLLTWGTVI EAAIEQ.PKSKDFTE GEDVTLH**C**NHS TIGL.....KDY IH**W**YWQNP NQSPQYIIH GLQ.....DT VTN.....N MASLTIATDR KSSS**L**VLPRVAL RDSAVYY**C** ALTE..[7.5.4]

TRAV45-8 F MLSVSHLLLVIFLLYRGTS GDSVTQTEVPVTLSE RELLMLN**C**TYQ TTDS.....DPY LF**W**YVQYV NKAPQLLLK GSAA...NPR PEH.....Q GFQATLVKSS RTFH**L**QKPSVQT SDSAVYY**C** ALR...[7.7.3]
