# Supplementary material for: The Genomic Organisation of the TRA/TRD Locus Validates the Peculiar Characteristics of Dromedary δ-Chain Expression
Source: Preprints.org preprint supplement (doi:10.20944/preprints202103.0379.v1), 2021-03-15
Supplement: Supplementary file 2 [file Supplementary Figure S2.doc]

LEADER FR1-IMGT CDR1-IMGT FR2-IMGT CDR2-IMGT FR3-IMGT CDR3-IMGT

(1-26) (27-38) (39-55) (56-65) (66-104) (105-117)

A B BC C C' C'C" C" D E F FG

(1-15) (16-26) (27-38) (39-46) (47-55) (56-65) (66-74) (75-84) (85-96) (97-104) (105-117)

——————————————> ——————————> ———————> ————————> ————————> —————————> ———————————> ———————>

Gene Functionality 1 10 15 16 **23** 26 27 38 39**41** 46 47 55 56 65 66 74 75 80 84 85 **89** 96 97 **104** 105

|........|....| |......|..| |..........| |.|....| |.......| |........| |.......| |....|...| |...|......| |......| |.....

TRDV1-1 F MLLSSLLGVFLALIFSGSAV AQTVTQDQPAVSSHV WETVTLN**C**RYE TSYS.....TYY IF**W**YKQPP SGEMTFLIR QG.......S SSGNAKS.G RYSVNFRKAE KSLS**L**TISNLQL EDSAKYF**C** ALRE..[7.3.4]

TRDV1-2 F MPLSSLLVVFLALIFSGSGV AQTVTQDQPAISSHV GETVTLN**C**RYE TSDS.....IYY IF**W**YKQPP SGEMTFLIH QG.......S SSGNANR.G RYSVNFRKAE KALS**L**TISNLLL KDSAKYF**C** ALRE..[7.3.4]

TRDV1-3 F MPLSSLLGVFLALIFSGSGV AQTVTQDQPAISSHV GESATLN**C**RYE TSYS.....TYN IV**W**YKQPP SGEMTFLIH QG.......S SSGNAKS.G RYSINFRKAE KSLS**L**TISNLQL EDSAKYF**C** AFDG..[7.3.4]

TRDV1-5 F MPLSSLLGVFLALVFSGSAV AQTVTQDQPALSSHL GESATLN**C**QYE TSYT.....EYY IF**W**YKQPP SGEMTFLIQ QY.......S SSGNAKS.G RYSVNFRKAE KSLS**L**TISNLQL EDSAKYF**C** ALEE..[7.3.4]

TRDV1-6 F MPLSSLLGVFLALIFSGSAV AQTVTQDQPAVSSHV GQTATLN**C**QYE TSYS.....TYY IF**W**YKQPP SGEMTFLIR QE.......Y NRGNAKS.G RYSVNFRKAE KSLS**L**TISNLQL EDSAKYF**C** ALDE..[7.3.4]

TRDV1-7 F MPLSSLLGVFLALIFSGSAV AQTVTQDQPAVSSHV GETATLN**C**RYE TSWS.....YYY IV**W**YKQPP SGEMTFLIH QD.......S SSGNAKS.G RYSINFRKAE KSLS**L**SISNLQL EDSAKYF**C** ALWE..[7.3.4]

TRDV2 F MQRVCSLIHLTLFWAGIMS ADVLVPQDAAVTVSV GGSVTLR**C**SMK GGPI....SDYY NY**W**YRKIP GSTMTFVFR EG.......G TYGPGFQ.E NFRGEVDQVN NQVL**L**EILKASE GDKGSYY**C** AAT...[7.3.3]

TRDV3 F MILLVGVSLLLACKGVL SAKVTQTSRDQTVAS GSEVTLP**C**TFE TEYS.....DPD LY**W**YRMRP GLSLEFVLY RDN....TES LNADFAQ.G RFSVQHNVAQ KTFH**L**VMSSVRA EDSATYY**C** VLEY..[7.6.4]

TRDV4 F MLPTCPLFSLTIFCTGVSL GIILEPETKTLTVPL GGPATFR**C**NVT GGDL....GSYQ MS**W**YKKNE DQSLTSVYR QG.......N NATDGAR.S KFKGKVDALK SQYI**L**DIQNATA EDVGTYY**C** GSDI..[7.3.4]
