# Supplementary material for: The Genomic Organisation of the TRA/TRD Locus Validates the Peculiar Characteristics of Dromedary δ-Chain Expression
Source: Preprints.org preprint supplement (doi:10.20944/preprints202103.0379.v1), 2021-03-15
Supplement: Supplementary file 4 [file Supplementary Figure S4.doc]

**(A)**

5’D-NONAMER 12–spacer 5’D-HEPTAMER 3’D-HEPTAMER 23-spacer 3’D-NONAMER

GGTTTTTGT ************ CACTGTG TRDD CACAGTG *********************** ACAAAAACC

TRDD1 ggttattgt actgctgtgttt cactgtg ACAGTATACGGAC cacagtg gggcaagtgtatgaagcctttgt tcaaaaacc

T V Y G

Q Y T D

S I R

TRDD2 ggtttttgt aaaggtctgtag cactgtg GGTGGGATTTC cacagtg ctgcaaaacccacagagacctct acagaaact

G G I

V G F

W D F

TRDD3 ggttattgt actgctgtggtt tactgtg TCTCAGAAC catagag gttgacgtgcactaatcatttgt tcaaaaacc

S Q N

L R

S E

TRDD4 ggtttttgt aaagctctgtag cactgtg ACTGGCTGGACTC cacagtg ctacaaaacccacagagacctct acagaaact

T G W T

L A G L

W L D

TRDD5 ggttattgt actgctgtgttt cactgtg ACGATACGTGGAC cacagtg ggggaagtgtacgaagcctttgt tcaaaaacc

T I R G

R Y V D

D T W

TRDD6 ggtttttgt aaagctctgtag tactgtg GCCAGGAGACT cacagtg atacaaaacccacagagacctgt acaaaaact

A R R

P G D

Q E T

**(B)**

J-NONAMER 12–spacer J-HEPTAMER

GGTTTTTGT ************ CACTGTG TRDJ 5'splice donor

TRDJ1 ggtttttgg aaagccctcaag cactgtg CTGTATCTACTAAAGGCAAGTTCGTCTTTGGAAATGGAATGCGTGTGATCGTGGAACCAA gtaagt

V S T K G K F V F G N G M R V I V E P

TRDJ2 cttttttgt aaggccatctca agtggtg ATTTGAAAGCACAGCTTATCTTTGGAAAGGGGACTCAACTCACCGTGGAACCAA gtaagt

L K A Q L I F G K G T Q L T V E P

TRDJ3 gttaccggt aaggcagcacca caatgtg CTCCTGGGACACCCGACAGATGTTTTTTGGAGCTGGCACCAAACTCTTCGTGGAGCACC gtgagt

S W D T R Q M F F G A G T K L F V E H

TRDJ4 agtttttag actgggtttacc agctgtg CAGGATCCACTGATATTCGGCAAAGGAACCTATCTGAATGTTGAACCAC gtaagt

Q D P L I F G K G T Y L N V E P

**(C)**

**C-DOMAIN**

A AB B BC C CD D DE E EF F FG G

(1-15) (16-26) (27-38) (39-45) (77-84) (85-96) (97-104) (105-117) (118-128)

——————————————> ——————————> ——————> ———————> ———————————> ———————> ——————————> ——————————>

1 10 15 16 **23**26 27 38 3941 45 77 80 84 85 89 96 97 **104** 105 117 118 128

87654321|........|....|123|......|..| |........| |.|...|1234567|..|...|12345677654321|...|......|12|......| |...........| |.........|

TRDC [EX1](X)KQSVATPSVFVMKNG...........TKVA**C**LVK DFYP..KDIN INLQSAKKI.....KEYDPAIVVSPS.......GRYSAIKLGQYED......SDSVT**C** SVQHN...EQIFN STDLELKKTVS

**CO TM CY**

| |

[EX2]**(V)TPKPKASENNNQTSKTCYEPQ** [EX3] **(V)PAGKVNMMSLSVLGFRMLFAKTVAVNFLLTAKLFFF**
