# Supplementary material for: The Genomic Organisation of the TRA/TRD Locus Validates the Peculiar Characteristics of Dromedary δ-Chain Expression
Source: Preprints.org preprint supplement (doi:10.20944/preprints202103.0379.v1), 2021-03-15
Supplement: Supplementary file 6 [file Supplementary Figure S7.xlsx]

## Sheet: Spleen
		ACAGTATACGGAC GGTGGGATTTC ACTGGCTGGACTC GGTGGGATTTC ACGATACGTGGAC GCCAGGAGAC TRDD1 TRDD2 TRDD4 TRDD* TRDD5 TRDD6
CLONES	SUBGROUPs	CDR3	TRDD	TRDJ	CDR3 length (AA)
sc7	TRDV1	GCTCTTGAcctatacggtactggctggaggggggatctcgtcttccgggagactagtcatCTGATATTC A L D L Y G T G W R G D L V F R E T S H L I F	D4_D6	J4	22
sc12	TRDV1	GCTCTTGATGAAAagatgagtatacggtggggtttgggatggCAGGATCCACTGATATTC A L D E K M S I R W G L G W Q D P L I F	D1_D2_D4	J4	19
sc19	TRDV1	TCTCTTGATGAAAGaagtacagtatacggacggtggggtcgcactgattggactcaaaagggggcctacgatacgtggacgtcgggagtttccagggtgaaTCCACTGATATTC S L D E R S T V Y G R W G R T D W T Q K G A Y D T W T S G V S R V N P L I F	D1_D2_D4_D5	J4	37
sc22	TRDV1	GCTCTTGATGAAAaccgccagtatacgggctggactggggccgggagactagaccgggcaCCACTGATATTC A L D E N R Q Y T G W T G A G R L D R A P L I F	D1_D4_D6	J4	23
sc54	TRDV1	ggtaatccgagctacagtatacggacggtgggcCTGATATTC G N P S Y S I R T V G L I F	D1_D2	J4	13
sc58	TRDV1	GCTCTTGccctgagagagtatacggactggctggactcgttgggatctaaaagatggcggatGGATCCACTGATATTC A L A L R E Y T D W L D S L G S K R W R M D P L I F	D1_D4	J4	25
sc73	TRDV1	tctctagaagaatttacggacgaggggtactggctagactcgggaggagactccgcTCCACTGATATTC S L E E F T D E G Y W L D S G G D S A P L I F	D1_D4_D6	J4	22
sc98	TRDV1	GCTCTTGATGAAccccgtcgtagacagtatacggacgtggggtggggtctcgcgtggacgagacaacccCTGATATTC A L D E P R R R Q Y T D V G W G L A W T R Q P L I F	D1_D2_D4_D5	J4	25
JD3.02	TRDV1	GCTCTTGATGtcctcttgaggcctagtagtggctggtgggatcgcgcgctTCCACTGATATTC A L D V L L R P S S G W W D R A L P L I F	D2	J4	20
sc10	TRAV33/DV6	GCTCTCTGGCGTTAtccccgtatacggacgggccgtacgatacgctgGGATCCACTGATATTC A L W R Y P R I R T G R T I R W D P L I F	D1_D4_D5	J4	20
sc44	TRAV33/DV6	GGTCTCTGGCGgctcggcgtatacggacgggatggctgcactgggtccggcgtggacggggccgggatcggagcgCAGCTTATCTTT G L W R L G V Y G R D G C T G S G V D G A G I G A Q L I F	D1_D4	J2	28
sc47	TRAV33/DV6	CCTCTCTGGGAcaatctactggctggactcgggagagagccgcgagagaagCTGATATTC P L W D N L L A G L G R E P R E K L I F	D4	J4	19
sc113	TRAV33/DV6	GCTCTCTGGGATTtcacgggcagtatggacccgtgggatacacgtggaaCACTGATATTC A L W D F T G S M D P W D T R G T L I F	D2	J4	19
JD3.01	TRAV33/DV6	GCTCTCTGGGActcgacgcggcatacggggtactggctggactcgggagacgggCCAGATCCACTGATATTC A L W D S T R H T G Y W L D S G D G P D P L I F	D4_D6	J4	23
JD3.11	TRAV33/DV6	GCTCTCTcccacgacagtatacagtactggctggactcgggagacgggCCAGATCCACTGATATTC A L S H D S I Q Y W L D S G D G P D P L I F	D1_D6	J4	21
JD3.28	TRAV33/DV6	GCTCTCTGGGATTtttggcggaggggtttctgggtggacgacGATCCACTGATATTC A L W D F W R R G F W V D D D P L I F	D2_D5	J4	18
sc43	TRDV3	GTTCTGGAtcctttagttgaagcgacaggccgtggacggagaggagaTCCATTGATTTTC V L D P L V E A T G R G R R G D P L I F	D6	J4	19
m5	TRDV3	GTTCTGGAccttatgcgccgggctacgatacgtggacgttttggGGATCCACTGATCTTC V L D L M R R A T I R G R F G D P L I F	D5	J4	19
m10	TRDV3	GTGCTGGGtttcactggctggactcggggacccgcgctgggagcttgTCCACTGATATTC V L G F T G W T R G P A L G A C P L I F	D4_D5	J4	19
m14	TRDV3	GTTCTGGAGcccagatacggggtgatttcgatacgtgggagaCAGGATCCACTGATATTC V L E P R Y G V I S I R G R Q D P L I F	D1_D5_D6	J4	19
m16	TRDV3	GTTCTGGAGTACggggtggatctcattacgatacgtgggagactGGATCCACTGATATTC V L E Y G V D L I T I R G R L D P L I F	D5	J4	19
m30	TRDV3	GTTCaaaacgcgtacggacgtggggttcggtgggtcgaggggcgtagatacaccccacttgctgggaggctTCCACTGATATTC V Q N A Y G R G V R W V E G R R Y T P L A G R L P L I F	D2	J4	27

## Sheet: Tonsils
		ACAGTATACGGAC GGTGGGATTTC ACTGGCTGGACTC GGTGGGATTTC ACGATACGTGGAC GCCAGGAGAC TRDD1 TRDD2 TRDD4 TRDD* TRDD5 TRDD6
CLONES	SUBGROUPs	CDR3	TRDD	TRDJ	CDR3 length (AA)
ts6	TRDV1	GCTCTCTGGGAgctagtacttcgtggttcggggggagacacacaaTTC A L W E L V L R G S G G D T Q F	ND	J4	15
ts11	TRDV1	GCTCTCTGGGAccgcccgttcggagacgacgtgcccagttacCCACTGATATTC A L W D R P F G D D V P S Y P L I F	ND	J4	17
ts19	TRDV1	GCTCTCTGcgaaagaagggtgtggggtactggctggactcggggatcccaacgaggcgtgaggagacctcctcTATCTACTAAAGGCAAGTTCGTCTTT A L C E R R V W G T G W T R G S Q R G V R R P P L S T K G K F V F	D2_D4_D5_D6	J1	32
ts30	TRDV1	gtgttcccgcatacggggtggggtttgggattttctCCACTGATATTC V F P H T G W G L G F S P L I F	D1_D2_D*	J4	15
ts31	TRDV1	GCTCTTGATGAAAacaagagtatacgggggccctactggagggtgggaccgagggtggccctcgccTTGAAAGCACAGCTTATCTTT A L D E N K S I R G P Y W R V G P R V A L A L K A Q L I F	D1_D2_D*	J2	28
	TRDV1
ts32	TRDV1	GCTCTAaaaaagtggggctgggtgggattcataggatacgtggtaactgggacggggCCACTGATATTC A L K K W G W V G F I G Y V V T G T G P L I F	D2_D*_D5	J4	22
ts58	TRDV1	GCgttcccgtatacggggtggggtttgggattttctCCACTGATATTC A F P Y T G W G L G F S P L I F	D1_D2_D*	J4	15
ts62	TRDV1	GCTCTCagagatgggaaggctgggggtggggtgggattcccattcgcctggacggtgcgggagacgggTCCACTGATATTC A L R D G K A G G G V G F P F A W T V R E T G P L I F	D2_D4_D6	J4	26
ts9	TRAV33/DV6	GCTCTCTGGGATTACgtgggggggggtgggatcggcccgatacgtggagggagactcCCACTGATATTC A L W D Y V G G G G I G P I R G G R L P L I F	D2_D*_D5	J4	22
ts11	TRAV33/DV6	GCTCTCTGGCGaccatacggcggcgctggactcgggggggctgcACTGATATTC A L W R P Y G G A G L G G A A L I F	D1_D4	J4	17
ts13	TRAV33/DV6	GCTCTCTGGCGcccatacggtgggatcggactagggggAGCACAGCTTATCTTT A L W R P Y G G I G L G G A Q L I F	D1_D2_D4	J2	17
ts21	TRAV33/DV6	GCTCTCTGGcgtccgcacggttcagtatccctccggcacgtgggagacttGGATCCACTGATATTC A L W R P H G S V S L R H V G D L D P L I F	D1_D6	J4	21
ts1	TRDV3	GTcggcccccctcgtgggacggggtacgataggccgggagactATCCACTGATATTC V G P P R G T G Y D R P G D Y P L I F	D2_D6	J4	18
ts5	TRDV3	GTTCcgggaggtggacagctACTGATATTC V P G G G Q L L I F	D2	J4	9
ts7	TRDV3	GTTCTGGgcacaacagtgggagccggcggTCCACTGATATTC V L G T T V G A G G P L I F	D2	J4	13

## Sheet: Blood
		ACAGTATACGGAC GGTGGGATTTC ACTGGCTGGACTC GGTGGGATTTC ACGATACGTGGAC GCCAGGAGAC TRDD1 TRDD2 TRDD4 TRDD* TRDD5 TRDD6
CLONES	SUBGROUPs	CDR3	TRDD	TRDJ	CDR3 length (AA)
bl1	TRDV1	GCTCTAaaaaagtggggctgggtgggattcataggatacgtggtaactgggacggggCCACTGATATTC A L K K W G W V G F I G Y V V T G T G P L I F	D2_D*_D5	J4	22
bl3	TRDV1	GCTCTCAGAGAAGcttgggaatggtggagACTGATATTC A L R E A W E W W R L I F	D2_D*	J4	12
bl4	TRDV1	GCTCTTGATGggggggagagggtatacgggtgggactggctggtgggatttttggggctgggttacGATCCACTGATATTC A L D G G E R V Y G W D W L V G F L G L G Y D P L I F	D1_D2_D4_D*	J4	26
bl6	TRDV1	GCTCTTGccccacccttacagtatgggcctgtactggttggaccggggggccccgctggaggtctacgatgctgggTGATATTC A L A P P L Q Y G P V L V G P G G P A G G L R C W V I F	ND	J4	27
bl8	TRDV1	GCTCcctttattctggtgggatgggtgacggtgggTCCACTGATATTC A P F I L V G W V T V G P L I F	D2_D*	J4	15
bl9	TRDV1	GCTCccgacgacggacgtggggtactggctggacggattttaagtggacgacgtgtggacatggggggTCCACTGATATTC A P D D G R G V L A G R I L S G R R V D M G G P L I F	D2_D4_D5	J4	26
bl10	TRDV1	GCTCTTGATGAtagggggggccttatacgaggctgggaccacggGGATCCACTGATATTC A L D D R G G L I R G W D H G D P L I F	D1_D2	J4	19
bl11	TRDV1	GCTCTTGATGAAAacaagagtatacgggggccctactggagggtgggaccgagggtggccctcgccTTGAAAGCACAGCTTGTCTTT A L D E N K S I R G P Y W R V G P R V A L A L K A Q L V F	D1_D2_D*	J2	28
bl12	TRDV1	GCgttcccgtatacggggtggggtttgggattttcTCCACTGATATTC A F P Y T G W G L G F S P L I F	D1_D2_D*	J4	15
bl13	TRDV1	GCTCTCagtagaagatatgggggcttagggCCACTGATATTC A L S R R Y G G L G P L I F	D1_D4	J4	13
bl14	TRDV1	GCTCcgcctcggggggctggactcgatgggatcccttacgatacaaccgggagacggCCACTGATATTC A P P R G A G L D G I P Y D T T G R R P L I F	D4	J4	22
bl15	TRDV1	GCTCTCTGGGAccgcccgttcggagacgacgtgcccagttATCCACTGATATTC A L W D R P F G D D V P S Y P L I F	D6	J4	17
bl19	TRDV1	GCTCTCTGGGAAAagtatgggtgggttacgtggagggagactcggCCACTGATATTC A L W E K Y G W V T W R E T R P L I F	D1_D2_D5_D6	J4	18
bl20	TRDV1	GCTCccccttcgcactggatggagagactgcgGAAAGCACAGCTTATCTTT A P P S H W M E R L R K A Q L I F	ND	J2	16
bl21	TRDV1	GCTCTGTGGGtcaaaattcagagtatacggacgtggggtttcggtggaccccgtggaccgcgagggggaggaaCTACTAAAGGCAAGTTCGTCTTT A L W V K I Q S I R T W G F G G P R G P R G G G T T K G K F V F	D1_D2_D*_D5	J1	32
bl22	TRDV1	GCTCTCAGAGAAGactggggtttcgctggacgggcgctgggagacccccGGGACACCCGACAGATGTTTTTT A L R E D W G F A G R A L G D P R D T R Q M F F	D2_D6	J3	23
bl23	TRDV1	GCTCTCAGAGAgggggtcgaggctcggtgggagtggggagacggtCCTCTGATATTC A L R E G V E A R W E W G D G P L I F	D2_D*	J4	18
bl24	TRDV1	GCTCTCAGAGccctaggggaggggttgactcgaggatacgtgggaGACCCACTGATATTC A L R A L G E G L T R G Y V G D P L I F	D2_D5	J4	19
bl25	TRDV1	GCTCTCAGAGAgagtatactggggtactggctggtgggattgggagAGGATCCACTGATATTC A L R E S I L G Y W L V G L G E D P L I F	D1_D4_D*	J4	20
bl26	TRDV1	GCTCTCAGAGAtctttgggtatacggacgaggggtttactccaAGCTTATCTTA A L R D L W V Y G R G V Y S K L I L	D1	J2	17
bl28	TRDV1	GCTCTCAGAGggaattgggtaacggctggacgggatggacggatacgtgggagagtagaggCACTGATATTC A L R G N W V T A G R D G R I R G R V E A L I F	D4_D5	J4	23
bl29	TRDV1	GCTCTCTGGGAAAtcgtcacggacgggctgtggtcccgatacgtggaggacggGGATCCGCTGATTTTC A L W E I V T D G L W S R Y V E D G D P L I F	D5	J4	22
D4bl2	TRDV3	GTTCTGGAGTACggggtggatctcattacgatacgtgggagactGGATCCACTGATATTC V L E Y G V D L I T I R G R L D P L I F	D5	J4	19
D4bl10	TRDV3	GTTCTGGAGggtttgggatttcagacgacacgtgggagaCAGGATCCACTGATATTG V L E G L G F Q T T R G R Q D P L I L	D2_D5	J4	18
